# Supplementary material
Source: publisher site journal article supplement (https://www.dovepress.com/article/475776)
Supplement: Supplementary file 1 [file get_supplementary_file.php]

**Supplementary data**

**Supplementary Table 1.** RT² Profiler™ PCR Array Human NFkB Signaling Pathway, PAHS-025Z, Qiagen.

| **Ligands and receptors**  *CD40 (TNFRSF5), CD83, EGFR, FASLG (TNFSF6), IL10, IL1A, IL1B, IL1R1, IL8, LTBR, NOD1 (CARD4), TLR1, TLR2, TLR3, TLR4, TLR6, TLR9, TNF, TNFRSF1A, TNFRSF10A, TNFRSF10B, TNFSF10.* | **Downstream signaling**  *BIRC2 (c-IAP2), FADD, IRAK1, IRAK2, IRF1, MYD88, RIPK1, TBK1, TICAM1 (TRIF), TNFAIP3, TRADD, TRAF2, TRAF3, TRAF6.* |
| --- | --- |
| **Transcription factors**  *NFKB1, NFKB2, REL, RELA, RELB.* |
| **Cytoplasmic sequestering/releasing of NF-κB**  *BCL3, CHUK (IKKa), IKBKB, IKBKG, NFKBIA, NFKBIE.* |
| **General immune response**  *CCL2 (MCP-1), CCL5 (RANTES), CSF1 (MCSF), CSF2 (GM-CSF), CSF3 (GCSF), ICAM1, IFNA1, IFNG, IL8, LTA (TNFB), TNF.* | **Other factors involved in the NF-κB pathway**  ***Kinases****: AKT1, MAP3K1, RAF1.*  ***Transcription factors****: ATF1, EGR1, ELK1, FOS, JUN, STAT1.*  ***Other genes****: CARD11, CASP1 (ICE), CASP8, CFLAR (CASPER), HMOX1, MALT1, PSIP1, RHOA, TIMP1.* |
| **Apoptosis**  *AGT, BCL2A1 (BCL-X), BCL2L1, BIRC3 (c-IAP1).* | **Pathway activity signature genes**  *BIRC3, CCL20, CD83, CXCL2, CXCL3, ICAM1, IL8, IRF1, NF-KB1, NF-KBIA, NF-KBIE, STX11, TIFA, TNF, TNFAIP2, TNFAIP3.* |

**Supplementary Table 2.** RT² Profiler™ PCR Array Human NFkB Signaling Targets, PAHS-225Z, Qiagen.

| **INFLAMMATION** | |
| --- | --- |
| **Cytokines & Chemokines**  *CCL11 (Eotaxin), CCL2 (MCP-1), CCL22 (MDC), CCL5 (RANTES), CSF1 (MCSF), CSF2 (GM-CSF), CSF3 (GCSF), CXCL1 (GRO1, GROa, SCYB1), CXCL10 (INP10), CXCL2 (GRO2, GROb, SCYB2), CXCL8 (IL8), CXCL9 (MIG), FASLG (TNFSF6), IFNB1, IFNG, IL12B, IL15, IL1A, IL1B, IL1RN, IL2, IL4, IL6, LTA (TNFB), LTB, TNF, TNFSF10 (TRAIL).* | **Acute inflammation**  *C3, CCL5 (RANTES), CFB, F3, F8, IL1A, IL1B, IL6, INS, STAT3, STAT5B.*  **Other Pro-Inflammatory Genes**  *AGT, AKT1, CCL11 (Eotaxin), CCL2 (MCP-1), CCL22 (MDC), CCR5, CD40 (TNFRSF5), CXCL1 (GRO1, GROa, SCYB1), CXCL10 (INP10), CXCL2 (GRO2, GROb, SCYB2), CXCL8 (IL8), CXCL9 (MIG), IL15, IL1RN, IL2, IL2RA (CD25), MYD88, PTGS2 (COX2), SELE, SELP, TNF, TNFRSF1B.* |
| **Immune ResponseS** | **APOPTOSIS and stress RESPONSES** |
| **Innate immunity**  *C3, CCL2 (MCP-1), CFB, IFNB1, IL12B, IL6, INS, MYD88, NFKBIA (IκBα, MAD3), STAT5B, TNF.*  **Adaptive immunity**  *C3, CCL2 (MCP-1), CD40 (TNFRSF5), CD80, ICAM1, IFNG, IL12B, IL1B, IL2, IL4, TRAF2.*  **Other immune response genes**  *D83, CXCL8 (IL8), FAS, FASLG (TNFSF6), IL1R2, LTA (TNFB), LTB, TNFSF10 (TRAIL).*  **Type I interferon responsive genes**  *ADM, CCL2 (MCP-1), CCL5 (RANTES), CD69, CD80, CDKN1A (p21CIP1, WAF1), CFB, CXCL10 (INP10), CXCL9 (MIG), IL15, IL1RN, IRF1, MYD88, NCOA, STAT1, TNFSF10 (TRAIL).* | **Apoptosis inducers**  *AGT, BIRC2 (c-IAP1), EGFR (ERBB1), FASLG (TNFSF6), GADD45B, IFNB1, IFNG, IL12B, IL2RA (CD25), IL4, INS, LTA (TNFB), MAP2K6 (MEK6, MKK6), MMP9, NQO1, NR4A2 (NURR1), PTGS2 (COX2) ,STAT1, TNFRSF1B, TNFSF10 (TRAIL), TP53 (p53), TRAF2.*  **Anti-Apoptotic factors**  *ADM, AKT1, BCL2A1 (BFL1), BCL2L1 (BCLXL), BIRC3 (c-IAP2), CCL2 (MCP-1), CDKN1A (p21CIP1, WAF1), CSF2 (GM-CSF), F3, FAS, IL1A, IL1B, IL2, IL6, MYD88, NFKBIA (IκBα, MAD3), SOD2 ,STAT5B, TNF, XIAP.*  **Stress Responses**  *ADM, AKT1, BCL2L1 (BCLXL), BIRC2 (c-IAP1), CCND1, CDKN1A (p21CIP1, WAF1), GADD45B, IFNG, IL1A, IL1B, MAP2K6 (MEK6, MKK6), NQO1, PDGFB, PLAU (UPA), SOD2, TNF, TP53 (p53), XIAP.* |
| **Differentiation & Development** | **NFkB Signalling** |
| **Lymphoid differentiation & development**  *D80, CD83, IL12B, IL15, IL2, IL2RA (CD25), IL4, IRF1, STAT5B, TP53 (p53), VCAM1.*  **Myeloid differentiation & development**  *CL5 (RANTES), CSF1 (MCSF), CSF2 (GM-CSF), CSF2RB, CSF3 (GCSF), IL4, MMP9, NFKBIA (IκBα, MAD3), STAT5B, TNF.*  **Nervous System Differentiation & Development**  *AGT, ALDH3A2, CXCL1 (GRO1, GROa, SCYB1), EGFR (ERBB1), EGR2, IFNG, NR4A2 (NURR1), SNAP25, SOD2, STAT3, TP53 (p53).* | **Transcription Factors**  *NFKB1, NFKB2, NFKBIA (IκBα, MAD3), RELB, STAT1.*  **Regulation of NFκB Signalling**  *BIRC2 (c-IAP1), CD40 (TNFRSF5), FASLG (TNFSF6), IL1B, MYD88, REL, RELA, TNF, TNFSF10 (TRAIL).*  **Transcription Factors NFκB Signalling**  *NFKB1, NFKB2, REL, RELA, RELB.*  **Other Transcription factors**  *GR2, IRF1, MYC, NR4A2 (NURR1) ,STAT1, STAT3, STAT5B, TP53 (p53).* |

**Supplementary Table 3.** RT² Profiler™ PCR Array Human Oxidative Stress Plus, PAHS-065Y, Qiagen

| **Endogenous antioxidant systems**  ***Glutathione peroxidases***: *GPX1, GPX2, GPX3, GPX4, GPX5, GSTP1, GSTZ1.*  ***Peroxiredoxins***: *PRDX1, PRDX2, PRDX3, PRDX4, PRDX5, PRDX6 (AOP2*).  ***Other peroxidases***: *CAT, CYBB, CYGB, DUOX1, DUOX2, EPX, LPO, MPO, PTGS1, PTGS2 (COX2), TPO, TTN.*  ***Other antioxidants***: *ALB, APOE, GSR, MT3, VIMP, SOD1, SOD3, SRXN1, TXNRD1, TXNRD2.* | **Metabolism of reactive oxygen species**  ***Superoxide dismutases***: *SOD1, SOD2, SOD3.*  ***Other genes involved in superoxide metabolism***: *ALOX12, CCS, DUOX1, DUOX2, MT3, NCF1, NCF2, NOS2 (iNOS), NOX4, NOX5, UCP2.*  ***Other genes involved in ROS metabolism***: *AOX1, BNIP3, EPHX2, MPV17, SFTPD.*  ***Oxygen transporters***: *CYGB, MB.* |
| --- | --- |
| **Oxidative stress responsive genes**  *APOE, ATOX1, CAT, CCL5 (RANTES), CYGB, DHCR24, DUOX1, DUOX2, DUSP1 (PTPN16), EPX, FOXM1, FTH1, GCLC, GCLM, GPX1, GPX2, GPX3, GPX4, GPX5, GSR, GSS, HMOX1, HSPA1A, KRT1, LPO, MBL2, MPO, MSRA, NQO1, NUDT1, PDLIM1, PRDX2, PRDX5, PRDX6 (AOP2), PRNP, RNF7, VIMP, SEPP1, SIRT2, SOD1, SOD2, SQSTM1, SRXN1, TPO, TTN, TXN, TXNRD1, TXNRD2.* | |
| **Pathway activity signature genes**  *AKR1C2, BAG2, FHL2, GCLM, GLA, HMOX1, HSP90AA1, LHPP, NCOA7, NQO1, PTGR1, SLC7A11, SPINK1, TRAPPC6A, TXN, TXNRD1****.*** | |

**Supplementary Table 4.** All correlations(including **n**on**-**statistically significant correlations) between differentially expressed genes and CSF AD biomarkers, MMSE and several PSG parameters.

|  | **AHI** | **CT90** | **Saturation Mean** | **Saturation Min** | **Arousal Index** | **ESS** | **ODI** | **MMSE** | **Ab42** | **Ttau** | **Ptau** |
| --- | --- | --- | --- | --- | --- | --- | --- | --- | --- | --- | --- |
| **RAF1** | 0.332 | -0.167 | 0.084 | 0.128 | 0.189 | 0.096 | -0.133 | -0.005 | -0.030 | -0.078 | 0.000 |
| **RELB** | 0.225 | -0.040 | -0.146 | -0.122 | 0.079 | -0.042 | 0.074 | 0.099 | -0.185 | 0.038 | 0.128 |
| **TNFSF14** | 0.225 | -0.098 | 0.072 | 0.156 | 0.366 | -0.003 | -0.117 | -0.138 | 0.095 | 0.056 | 0.200 |
| **ALOX12** | 0.140 | -0.244 | 0.088 | -0.006 | 0.424 | -0.136 | -0.140 | 0.028 | -0.087 | -0.091 | 0.024 |
| **DUSP1** | 0.322 | -0.144 | 0.007 | -0.042 | 0.205 | -0.009 | 0.087 | 0.086 | -0.257 | -0.056 | 0.037 |
| **GSR** | 0.390 | -0.016 | -0.044 | -0.181 | 0.196 | -0.075 | -0.019 | 0.021 | -0.053 | -0.034 | -0.042 |
| **PDLIM1** | 0.219 | -0.016 | -0.144 | -0.235 | 0.218 | -0.008 | 0.067 | 0.069 | -0.129 | 0.042 | 0.081 |
| **PTGS2** | 0.193 | -0.211 | 0.067 | 0.140 | 0.189 | -0.186 | 0.017 | 0.006 | -0.317 | -0.076 | 0.011 |
| **SOD2** | 0.309 | -0.153 | 0.105 | -0.007 | 0.302 | -0.135 | 0.079 | 0.136 | -0.127 | -0.027 | 0.017 |
|  |  |  |  |  |  |  |  |  |  |  |  |
